# Supplementary material for: Optical Coherence Tomography in a Cohort of Genetically Defined Hereditary Spastic Paraplegia: A Brief Research Report
Source: PubMed Central journal article supplement (PMC6884025; doi:10.3389/fneur.2019.01193), 2019-11-22

Δ R-SUP   Δ R-INF   Δ R-TEMP   Δ R-NAS   Δ L-SUP   Δ L-INF   Δ L-TEMP   Δ L-NAS

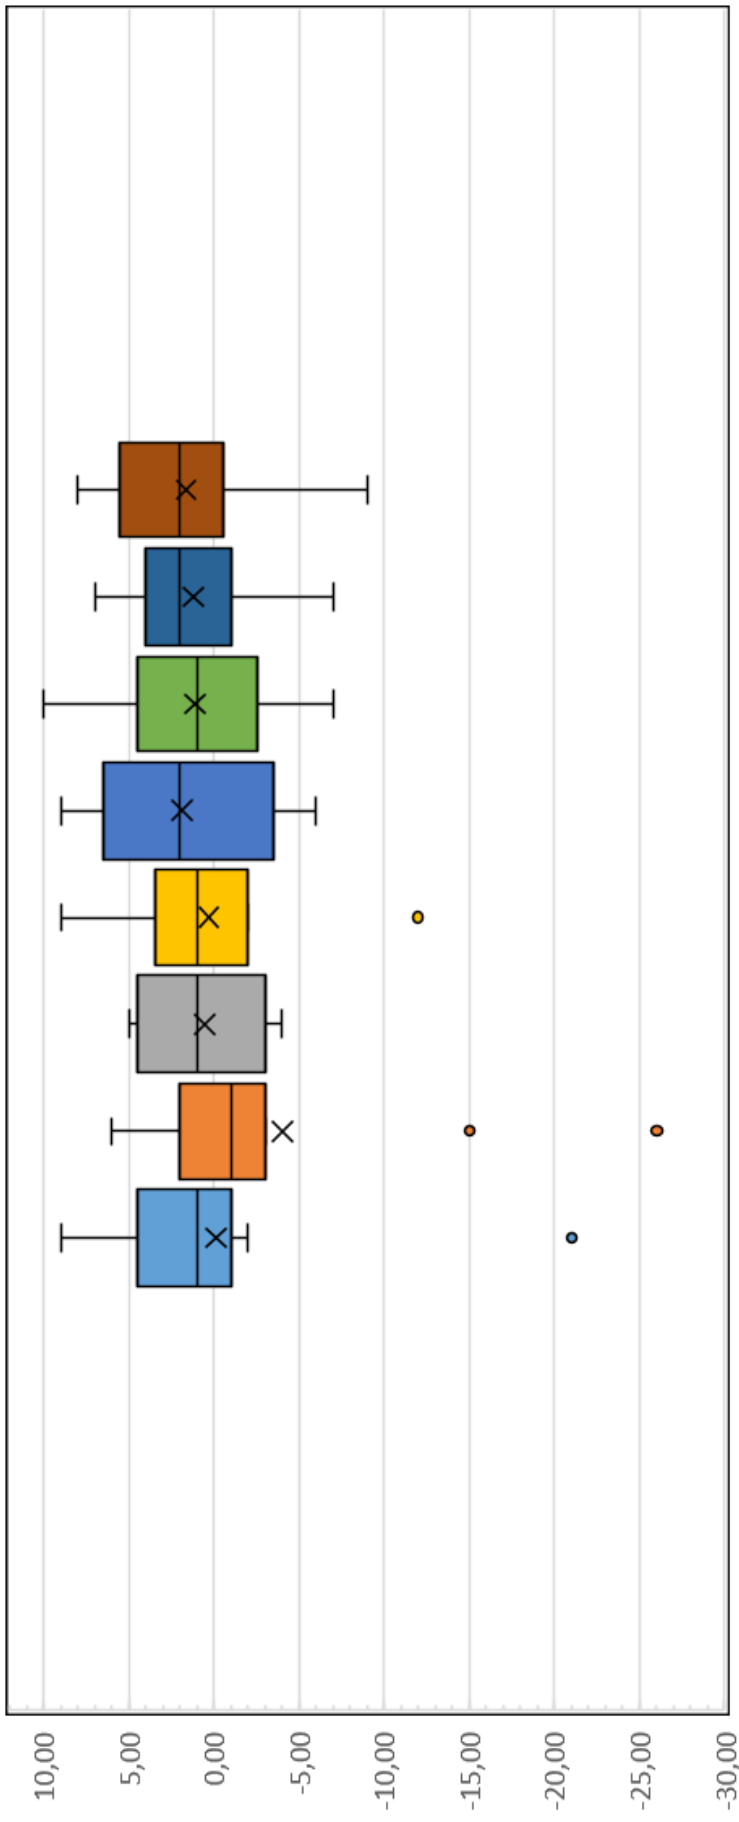

Supplement: Data_Sheet_1.pdf [file Data_Sheet_1.pdf]
