# Supplementary material for: Optical Coherence Tomography in a Cohort of Genetically Defined Hereditary Spastic Paraplegia: A Brief Research Report
Source: PubMed Central journal article supplement (PMC6884025; doi:10.3389/fneur.2019.01193), 2019-11-22
Supplement: Data_Sheet_2.pdf [file Data_Sheet_2.pdf]

## *Supplementary Material*

**Supplementary Figure 1.** Box-and-whiskers of the longitudinal RNFL thickness variation among all the quadrants bilaterally. Legend: RNFL: Retinal Nerve Fibre Layer; R-SUP: right superior; R-INF: right inferior; R-TEMP: right temporal; R-NAS: right nasal; L-SUP: left superior; L-INF: left inferior; L-TEMP: left temporal; L-NAS: left nasal.

Supplementary Material

**Supplementary Table 1.** Cross-sectional OCT scan raw data in all the subjects divided according to the genotype. Legend: Green: normal; Yellow: borderline (< -2 SD); Red: reduced (< -3 SD); R-SUP: right superior; R-INF: right inferior; R-TEMP: right temporal; R-NAS: right nasal; L-SUP: left superior; L-INF: left inferior; L-TEMP: left temporal; L-NAS: left nasal.

|       | RSUP | RINF | RTEMP | RNAS | LSUP | LINF | LTEMP | LNAS |
|-------|------|------|-------|------|------|------|-------|------|
| SPG3A | 86   | 97   | 71    | 44   | 87   | 93   | 68    | 36   |
|       | 114  | 143  | 54    | 82   | 113  | 126  | 69    | 62   |
|       | 110  | 109  | 79    | 40   | 117  | 114  | 69    | 44   |
|       | 126  | 121  | 73    | 43   | 132  | 132  | 66    | 53   |
|       | 105  | 118  | 81    | 50   | 110  | 122  | 76    | 51   |
|       | 120  | 123  | 80    | 48   | 128  | 112  | 74    | 45   |
| SPG4  | 119  | 135  | 71    | 112  | 134  | 131  | 74    | 100  |
|       | 124  | 110  | 62    | 76   | 131  | 106  | 59    | 71   |
|       | 126  | 112  | 68    | 64   | 106  | 86   | 54    | 43   |
|       | 84   | 100  | 61    | 68   | 76   | 104  | 63    | 62   |
|       | 118  | 131  | 85    | 72   | 120  | 132  | 76    | 78   |
|       | 120  | 137  | 70    | 83   | 109  | 143  | 69    | 78   |
|       | 98   | 110  | 73    | 55   | 110  | 113  | 62    | 59   |
|       | 80   | 106  | 57    | 61   | 86   | 109  | 54    | 63   |
| SPG5  | 110  | 86   | 67    | 53   | 122  | 78   | 63    | 67   |
|       | 103  | 110  | 45    | 61   | 111  | 120  | 44    | 71   |
| SPG7  | 92   | 92   | 64    | 46   | 94   | 97   | 56    | 48   |
|       | 119  | 132  | 53    | 83   | 130  | 123  | 62    | 65   |
| SPG8  | 111  | 116  | 67    | 63   | 110  | 120  | 67    | 58   |
|       | 104  | 118  | 94    | 68   | 94   | 86   | 69    | 58   |
| SPG72 | 117  | 104  | 74    | 76   | 126  | 118  | 68    | 77   |
|       | 114  | 134  | 77    | 99   | 112  | 138  | 75    | 109  |
|       | 84   | 111  | 77    | 68   | 117  | 134  | 67    | 78   |

**Supplementary Table 2.** Correlations of ranked variable values between the clinical and RNFL thickness in all quadrants bilaterally (Spearman rank order correlation). Legend: DD: disease duration; SPRS: Spastic Paraplegia Rating Scale; RNFL: Retinal Nerve Fibre Layer; Correlation is significant at the 0.05 level (2-tailed) as \* and at 0.01 level (2-tailed) as \*\*. Significant correlations appear in bold font.

| Variables           | R-SUP<br>(Rho;<br>Sig) | R-INF<br>(Rho; Sig)             | R-TEMP<br>(Rho; Sig) | R-NAS<br>(Rho;<br>Sig) | L-SUP<br>(Rho; Sig) | L-INF<br>(Rho; Sig) | L-TEMP<br>(Rho; Sig)           | L-NAS<br>(Rho; Sig)            |
|---------------------|------------------------|---------------------------------|----------------------|------------------------|---------------------|---------------------|--------------------------------|--------------------------------|
| <b>Age at OCT</b>   | -0,110;<br>0,616       | -0,121;<br>0,582                | -0,140;<br>0,524     | 0,332;<br>0,122        | -0,023;<br>0,918    | -0,067;<br>0,766    | -0,260;<br>0,231               | <b>0,516*;</b><br><b>0,012</b> |
| <b>Age at Onset</b> | -0,162;<br>0,461       | -0,373;<br>0,080                | -0,120;<br>0,585     | 0,193;<br>0,378        | -0,068;<br>0,758    | -0,187;<br>0,404    | -0,392;<br>0,064               | 0,370;<br>0,082                |
| <b>DD</b>           | 0,143;<br>0,517        | <b>0,574**;</b><br><b>0,004</b> | 0,171;<br>0,436      | 0,158;<br>0,472        | 0,015;<br>0,946     | 0,293;<br>0,185     | <b>0,436*;</b><br><b>0,037</b> | 0,010;<br>0,964                |
| <b>SPRS</b>         | 0,232;<br>0,288        | 0,328<br>0,126                  | 0,196;<br>0,370      | -0,196,<br>0,370       | 0,073;<br>0,740     | -0,037;<br>0,869    | 0,221;<br>0,311                | -0,349;<br>0,102               |
